# Supplementary material for: Parallel Evolution of Group B Streptococcus Hypervirulent Clonal Complex 17 Unveils New Pathoadaptive Mutations
Source: PubMed Central journal article supplement (PMC5585690; doi:10.1128/msystems.00074-17), 2017-09-05
Supplement: sys005172132sf1.pdf [file sys005172132sf1.pdf]

**Location**

- Africa (Kenya)
- Africa (Other)
- Asia (China)
- Europe
- North America (Canada)
- North America (Other)
- Oceania

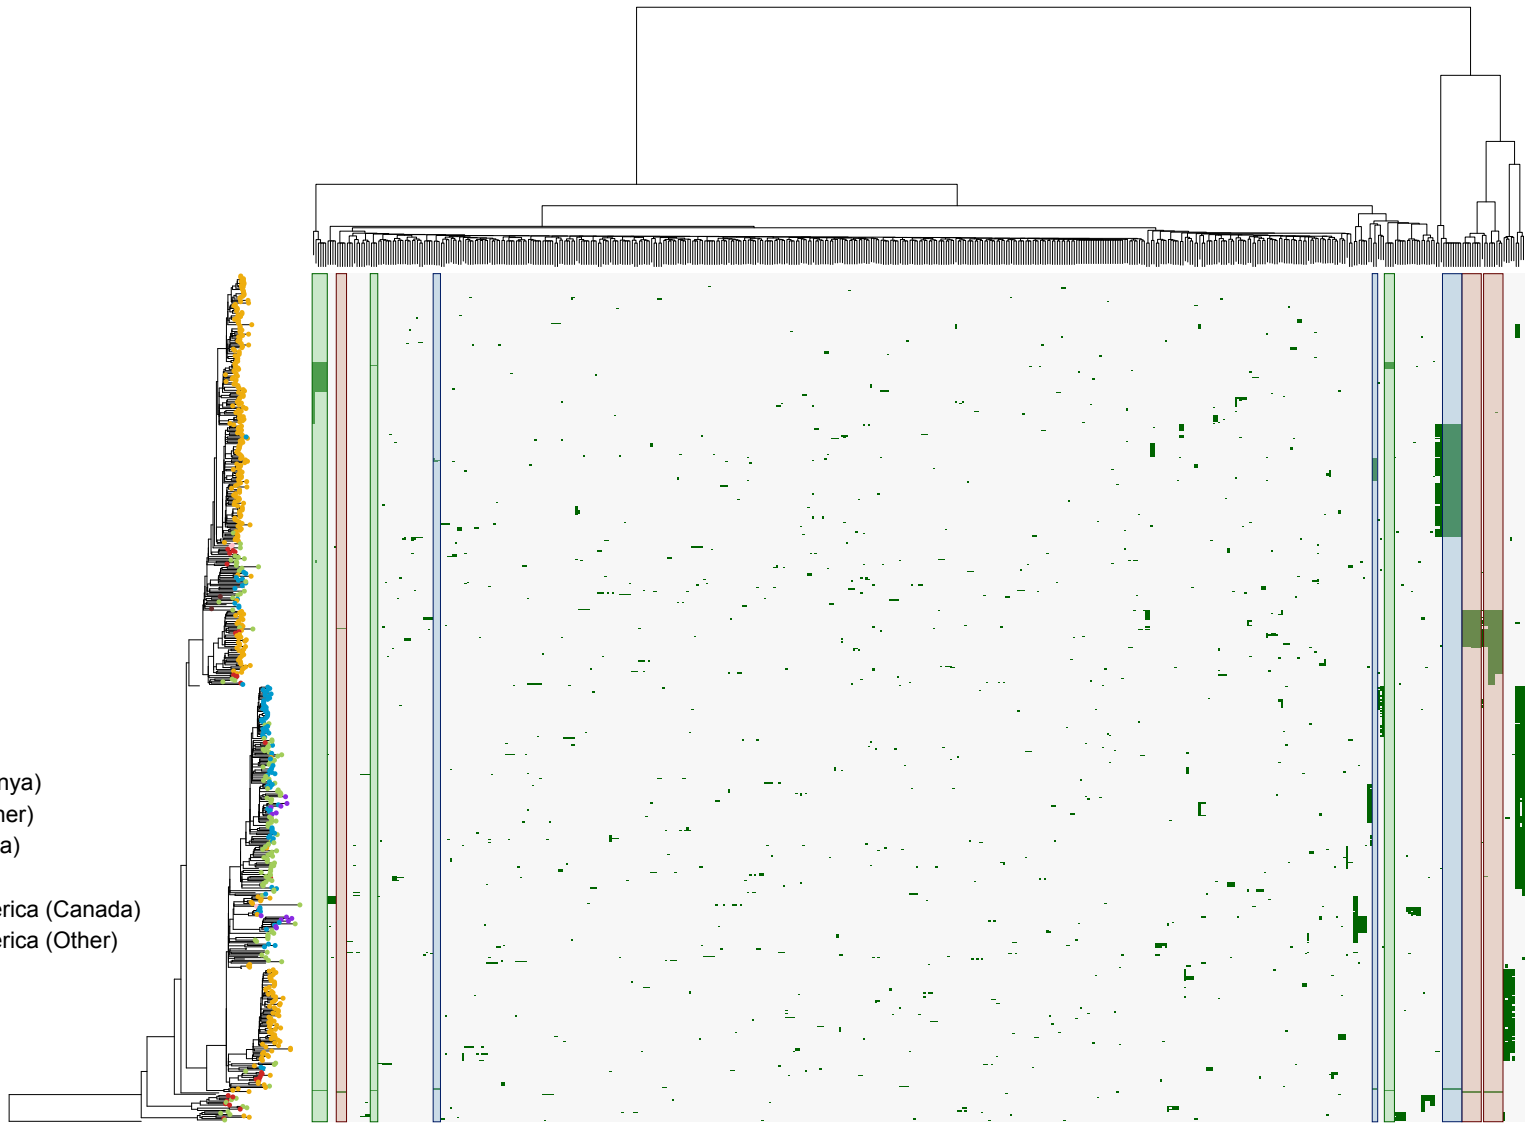

Fig. S1
