# Supplementary material for: Parallel Evolution of Group B Streptococcus Hypervirulent Clonal Complex 17 Unveils New Pathoadaptive Mutations
Source: PubMed Central journal article supplement (PMC5585690; doi:10.1128/msystems.00074-17), 2017-09-05
Supplement: sys005172132sf3.pdf [file sys005172132sf3.pdf]

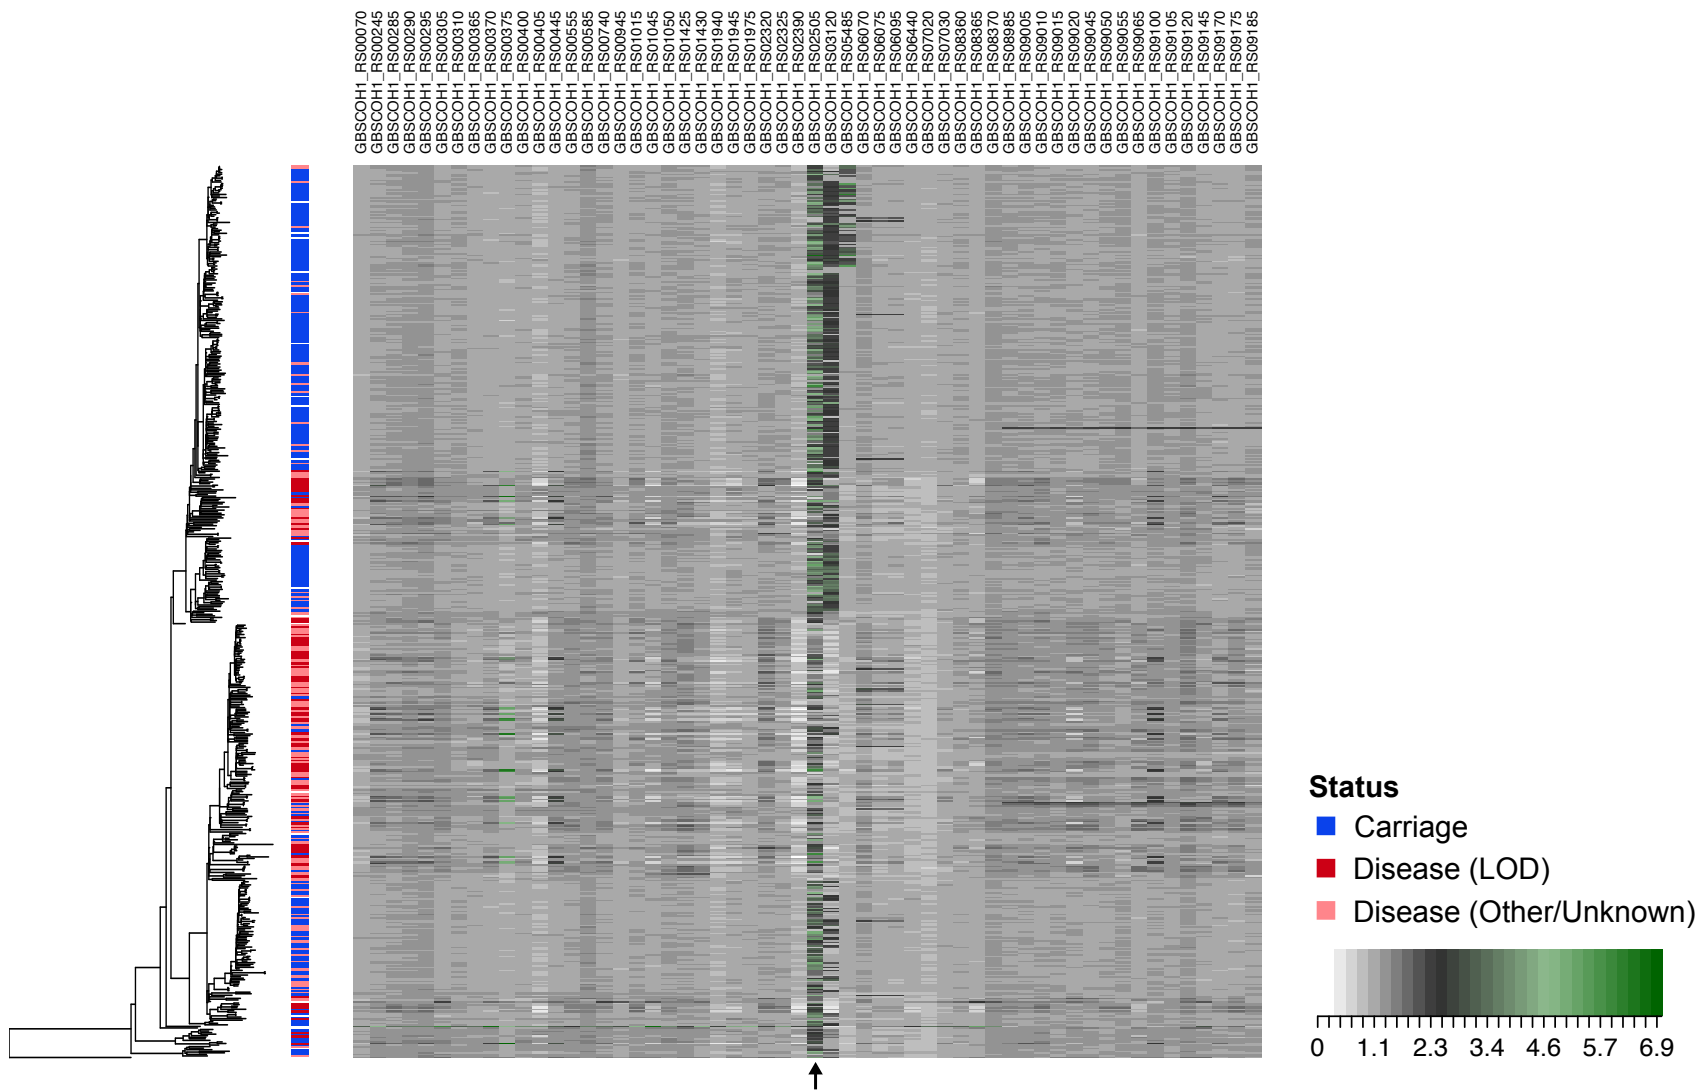

Fig. S3
